# Supplementary material
Source: PubMed Central journal article supplement (PMC2991495)
Supplement: NIHMS213455-supplement-supplement_1.pdf [file NIHMS213455-supplement-supplement_1.pdf]

Type of file: table

Label: 1

Filename: supplemental table 4\_9\_10.doc

**Supplemental Table** Falls and fractures compared between active HT versus control.

| Event                                                | Estrogen Trial (ET) |       |         |       | p <sup>1</sup>     | Estrogen plus Progestogen Trial (EPT) |       |         |       | p <sup>2</sup>    | HT Trials Combined |       |         |       |                    |
|------------------------------------------------------|---------------------|-------|---------|-------|--------------------|---------------------------------------|-------|---------|-------|-------------------|--------------------|-------|---------|-------|--------------------|
|                                                      | Active              |       | Placebo |       |                    | Active                                |       | Placebo |       |                   | Active             |       | Placebo |       | p                  |
|                                                      | N                   | %     | N       | %     |                    | N                                     | %     | N       | %     |                   | N                  | %     | N       | %     |                    |
| <i>Events occurring between 3 to 6 years</i>         |                     |       |         |       |                    |                                       |       |         |       |                   |                    |       |         |       |                    |
| ≥2 Falls per year                                    |                     |       |         |       |                    |                                       |       |         |       |                   |                    |       |         |       |                    |
| No                                                   | 424                 | 97.7% | 430     | 95.3% | 0.06               | 498                                   | 97.3% | 456     | 97.9% | 0.55              | 922                | 97.5% | 886     | 96.6% | 0.28               |
| Yes                                                  | 10                  | 2.3%  | 21      | 4.7%  |                    | 14                                    | 2.7%  | 10      | 2.1%  |                   | 24                 | 2.5%  | 31      | 3.4%  |                    |
|                                                      | median              |       | median  |       | 0.005 <sup>3</sup> | median                                |       | median  |       | 0.75 <sup>3</sup> | median             |       | median  |       | 0.03 <sup>3</sup>  |
| Number of falls per year                             | 0                   |       | 0.33    |       |                    | 0                                     |       | 0       |       |                   | 0                  |       | 0       |       |                    |
| Fractures (total)                                    |                     |       |         |       |                    |                                       |       |         |       |                   |                    |       |         |       |                    |
| No                                                   | 355                 | 96.5% | 368     | 94.9% | 0.28               | 417                                   | 95.4% | 357     | 94.7% | 0.63              | 772                | 95.9% | 725     | 94.8% | 0.29               |
| Yes                                                  | 13                  | 3.5%  | 20      | 5.2%  |                    | 20                                    | 4.6%  | 20      | 5.3%  |                   | 33                 | 4.1%  | 40      | 5.2%  |                    |
| <i>Events occurring between baseline and 6 years</i> |                     |       |         |       |                    |                                       |       |         |       |                   |                    |       |         |       |                    |
| ≥2 Falls per year                                    |                     |       |         |       |                    |                                       |       |         |       |                   |                    |       |         |       |                    |
| No                                                   | 443                 | 98.2% | 457     | 96.6% | 0.12               | 530                                   | 98.2% | 458     | 97.5% | 0.45              | 973                | 98.2% | 915     | 97.0% | 0.096              |
| Yes                                                  | 8                   | 1.8%  | 16      | 3.4%  |                    | 10                                    | 1.9%  | 12      | 2.6%  |                   | 18                 | 1.8%  | 28      | 3.0%  |                    |
|                                                      | median              |       | median  |       | 0.043 <sup>3</sup> | median                                |       | median  |       | 0.16 <sup>3</sup> | median             |       | median  |       | 0.012 <sup>3</sup> |
| # of falls per year                                  | 0.17                |       | 0.17    |       |                    | 0.17                                  |       | 0.17    |       |                   | 0.17               |       | 0.17    |       |                    |
| Fractures (total)                                    |                     |       |         |       |                    |                                       |       |         |       |                   |                    |       |         |       |                    |
| No                                                   | 413                 | 91.6% | 422     | 89.4% | 0.26               | 490                                   | 91.1% | 403     | 85.6% | 0.006             | 903                | 91.3% | 825     | 87.5% | 0.006              |
| Yes                                                  | 38                  | 8.4%  | 50      | 10.6% |                    | 48                                    | 8.9%  | 68      | 14.4% |                   | 86                 | 8.7%  | 118     | 12.5% |                    |

<sup>1</sup> comparison between active and placebo for ET trial

<sup>2</sup> comparison between active and placebo for EPT trial

<sup>3</sup> p-value obtained by nonparametric, Wilcoxon rank-sum test
